# Supplementary material for: Geometrical engineering of a SPAN–graphene composite cathode for practical Li–S batteries
Source: Royal Society of Chemistry journal article supplement (doi:10.1039/d2ta01398c), 2022-01-01
Supplement: d2ta01398c1.pdf [file d2ta01398c1.pdf]

Supporting information

## **Geometrical engineering of SPAN-graphene composite cathode for practical Li-S batteries**

Hun Kim,<sup>a,‡</sup> Jang-Yeon Hwang,<sup>b,‡</sup> Sangin Bang,<sup>a,‡</sup> Hun-Gi Jung,<sup>c</sup> and Yang-Kook Sun<sup>\*,a</sup>

<sup>a</sup> Department of Energy Engineering, Hanyang University, Seoul 04763, Republic of Korea.

<sup>b</sup> Department of Materials Science and Engineering, Chonnam National University, Gwangju 61186, Republic of Korea.

<sup>c</sup> Center for Energy Storage Research, Korea Institute of Science and Technology, Seoul 02792, Republic of Korea.

‡ These authors contributed equally to this work.

\*Correspondence author: [yksun@hanyang.ac.kr](mailto:yksun@hanyang.ac.kr)

**Table S1.** Elemental analysis of SPAN.

| Sample | Sulfur (wt%) | Carbon (wt%) | Nitrogen (wt%) | Hydrogen (wt%) |
|--------|--------------|--------------|----------------|----------------|
| SPAN   | 46.48        | 38.90        | 13.74          | 0.88           |

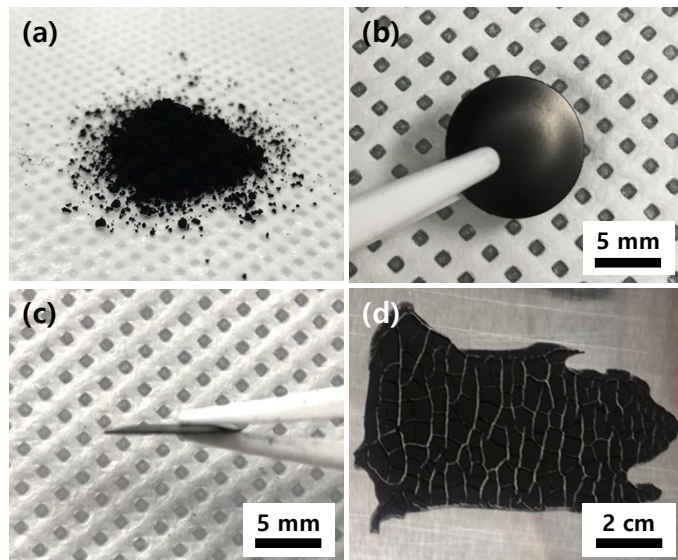

**Fig. S1.** Photographs of (a) a ball-milled SPAN/G mixture, a pelletized 2D-SPAN/G cathode ((b) top-view, (c) side view), and (d) a SPAN/G cathode with a sulfur loading of  $5 \text{ mg cm}^{-2}$ , prepared using a conventional casting method (cracked).

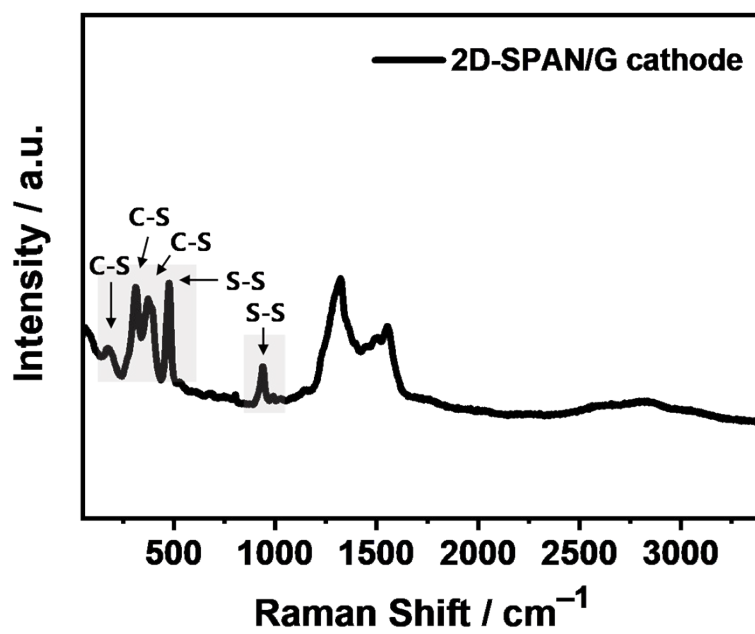

Fig. S2. Raman spectra of 2D-SPAN/G cathode.

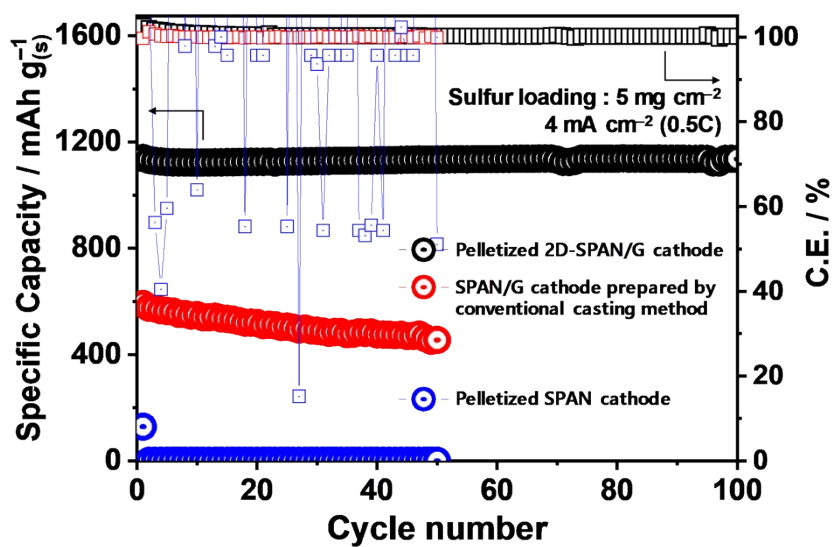

**Fig. S3.** Electrochemical performances of Li-S batteries. Cycling stability of Li-S batteries featuring SPAN/G cathodes prepared by pelletizing method and conventional casting method, and SPAN cathode prepared by pelletizing method with sulfur loadings of 5 mg cm<sup>-2</sup> (at 4 mA cm<sup>-2</sup> (0.5C)). Cycling data of the pelletized SPAN/G cathode is reproduced from the Fig. 3c to compare the electrochemical performance of each cathode.

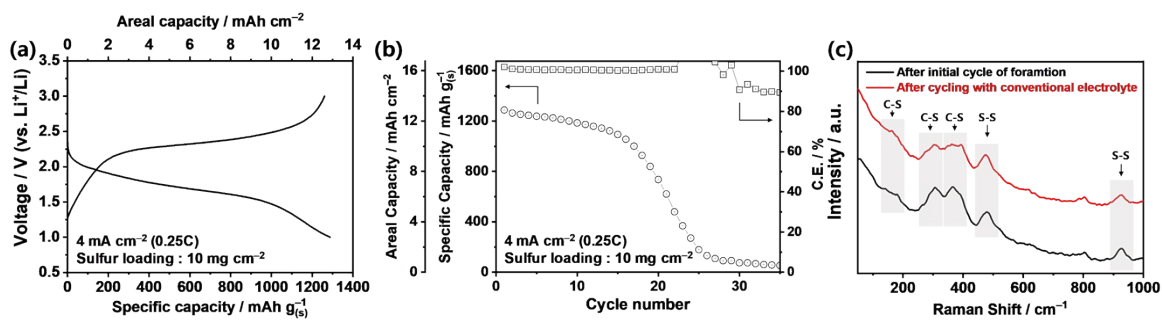

**Fig. S4.** Electrochemical performances of Li-S batteries featuring 2D-SPAN/G cathodes and conventional electrolyte (1 M LiPF<sub>6</sub> in EC:EMC (3:7 (v/v))). (a) Charge–discharge profiles of batteries cycled at 4 mA cm<sup>-2</sup>. (b) Cycling stability of a Li-S battery featuring a 2D-SPAN/G cathode with a sulfur loading of 10 mg cm<sup>-2</sup>. (c) Ex-situ Raman spectra of 2D-SPAN/G cathodes recovered from batteries after one cycle and cell failure.

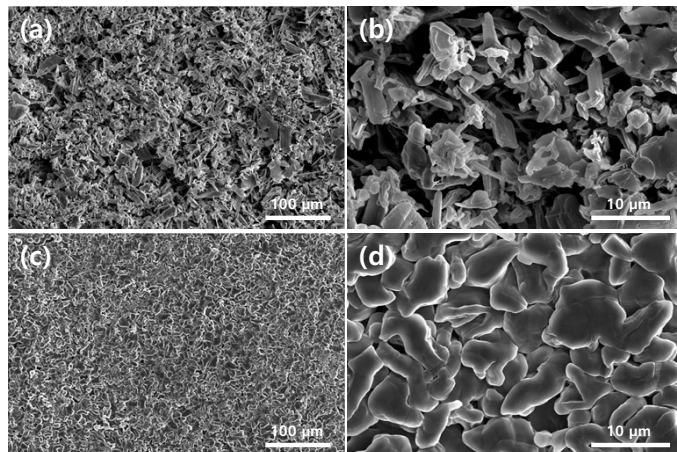

**Fig. S5.** SEM images of Li deposited on Cu foils in (a, b) conventional electrolyte (1 M LiPF<sub>6</sub> in EC:EMC (3:7 (v/v))) and (c, d) modified electrolyte (1 M LiPF<sub>6</sub> and 0.05 M LiDFOB in EMC:FEC (3:1 (v/v))). Li (capacity of 10 mAh cm<sup>-2</sup>) was deposited on the Cu foils in Li || Cu cells for 10 h.

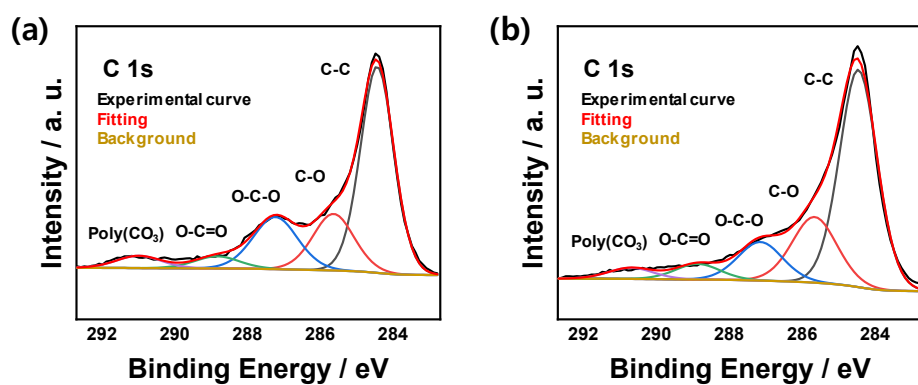

**Fig. S6.** Characterization of cathode/electrode interphase after the 1st cycle. XPS spectra of C 1s for the 2D-SPAN/G cathode operated in (a) conventional electrolyte and (b) modified electrolyte.



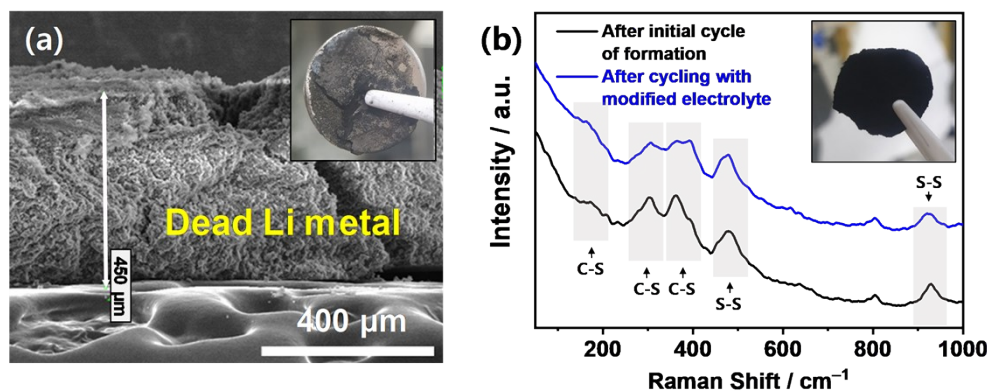

**Fig. S7.** (a) Cross-sectional SEM image of a Li-metal anode subjected to 500 cycles in a Li–S battery; inset: digital photograph of retrieved Li-metal anode. (b) Ex-situ Raman spectra of a 2D-SPAN/G cathode cycled in modified electrolyte after one and 500 cycles; inset: digital photograph of retrieved 2D-SPAN/G cathode.

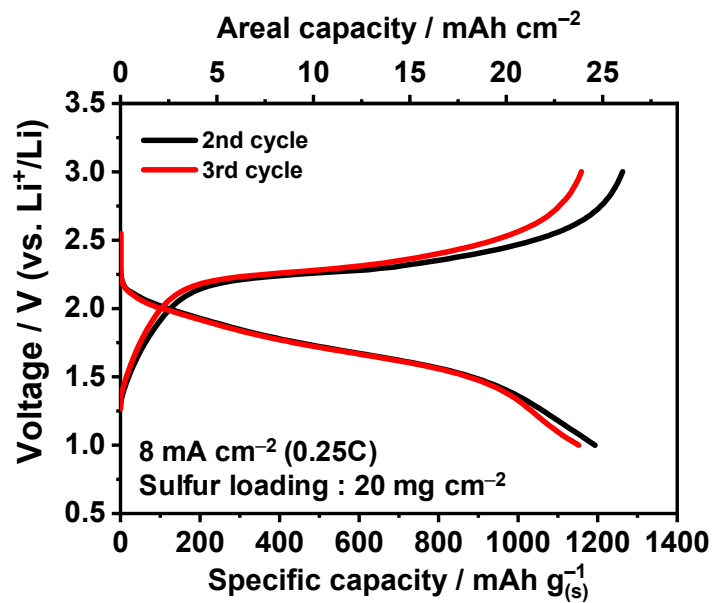

**Fig. S8.** Charge–discharge profiles of a Li–S battery featuring a 2D-SPAN/G cathode with a sulfur loading of 20 mg cm<sup>-2</sup>.

**Table S2.** Summary of reported SPAN-based Li–S batteries and their performances. The power density is calculated based on the cathode (in the case of sulfur loading > 3 mg cm<sup>-2</sup>) and nominal voltage is assumed as 1.8V.

| No. | Strategy                                                   | S loading (mg cm <sup>-2</sup> ) | Areal capacity (mAh cm <sup>-2</sup> ) | Current density (mA cm <sup>-2</sup> ) | Power density (W kg <sup>-1</sup> ) | Cycle life (cycles) | Retention (%) | Ref. |
|-----|------------------------------------------------------------|----------------------------------|----------------------------------------|----------------------------------------|-------------------------------------|---------------------|---------------|------|
| 1   | Carboxymethyl cellulose binder                             | 0.22                             | 0.23                                   | 0.33                                   | –                                   | 500                 | 110.0         | 45   |
| 2   | SPAN-porous carbon                                         | 0.4                              | 0.6                                    | 0.067                                  | –                                   | 100                 | 83.4          | 57   |
| 3   | FEC solvent                                                | 0.5 – 0.7                        | 0.9                                    | 0.28                                   | –                                   | 1,100               | 89.0          | 71a  |
| 4   | Tortuosity SPAN-4                                          | 0.5                              | 0.45                                   | 0.42                                   | –                                   | 200                 | 95.0          | 71b  |
| 5   | Textile Fiber-based S-PAN                                  | 0.67                             | 1.0                                    | 0.5                                    | –                                   | 1,000               | 77.3          | 71c  |
| 6   | LiBOB additive                                             | 0.7                              | 1.2                                    | 0.3                                    | –                                   | 100                 | 62.0          | 71d  |
| 7   | SPAN film with hollow tubular nanofiber(H-SPAN film)       | 0.7                              | 0.88                                   | 0.12                                   | –                                   | 300                 | 99.0          | 71e  |
| 8   | SPAN-SE                                                    | 0.86                             | 1.2                                    | 0.17                                   | –                                   | 200                 | 85.0          | 56   |
| 9   | S@pPAN-5                                                   | 0.86                             | 1.33                                   | 0.49                                   | –                                   | 100                 | 88.0          | 71f  |
| 10  | Li <sub>2</sub> SiO <sub>3</sub> additive                  | 0.93                             | 0.9                                    | 0.08                                   | –                                   | 100                 | 79.0          | 71g  |
| 11  | SPAN fiber in Mesoporous carbon polyhedron                 | 1.0                              | 1.5                                    | 0.16                                   | –                                   | 200                 | 84.4          | 71h  |
| 12  | FeS incorporated S-PAN                                     | 1.0 – 1.2                        | 1.2                                    | 6.0                                    | –                                   | 100                 | 72.0          | 71i  |
| 13  | Nonflammable electrolyte 1M LiBOB/TEP+FEC (7:3, v/v)       | 1.0                              | 1.38                                   | 1.68                                   | –                                   | 1,000               | 79.0          | 71j  |
| 14  | 1wt% TSMP + 2wt% VC additive                               | 1.0                              | 1.47                                   | 1.68                                   | –                                   | 800                 | 85.0          | 71k  |
| 15  | Mesoporous S-PAN                                           | 1.1                              | 1.3                                    | 3.0                                    | –                                   | 900                 | 85.7          | 32   |
| 16  | NiS <sub>2</sub> modified S-PAN                            | 1.15                             | 2.0                                    | 0.23                                   | –                                   | 100                 | 89.0          | 31   |
| 17  | S/DPAN/KB                                                  | 1.5                              | 1.69                                   | 0.39                                   | –                                   | 150                 | 81.0          | 46   |
| 18  | SPAN/CNT-12                                                | 2.0                              | 2.36                                   | 1.59                                   | –                                   | 800                 | 100           | 39   |
| 19  | SPAN/RGO by ball milling                                   | 2.1 – 2.8                        | 3.88                                   | 0.47                                   | –                                   | 200                 | 80.0          | 37   |
| 20  | Iodine doped S-PAN                                         | 2.3                              | 2.91                                   | 7.71                                   | –                                   | 1,000               | 85.0          | 71l  |
| 21  | FEC additive                                               | 2.5                              | 4.0                                    | 0.5                                    | –                                   | 100                 | 98.4          | 64   |
| 22  | Freestanding S/PAN/GO cathode                              | 2.5                              | 3.45                                   | 0.58                                   | –                                   | 100                 | 87.0          | 71m  |
| 23  | Mixing method                                              | 3.0                              | 4.0                                    | 1.0                                    | –                                   | 80                  | 74.0          | 71n  |
| 24  | PAA binder + FEC additive                                  | 3.0                              | 4.6                                    | 2.5                                    | –                                   | 100                 | 98.5          | 60   |
| 25  | Te-doped S@pPAN                                            | 3.1                              | 3.39                                   | 0.62                                   | 120.0                               | 100                 | 80.0          | 71o  |
| 26  | CoS <sub>2</sub> -SPAN-CNT                                 | 4.6                              | 5.06                                   | 1.81                                   | 305.9                               | 50                  | 77.0          | 38   |
|     |                                                            | 5.9                              | 5.72                                   | 2.32                                   | 305.7                               | 50                  | 52.0          |      |
| 27  | GG-PAA binder + Pressure optimized                         | 6.2                              | 8.49                                   | 1.05                                   | 108.5                               | 120                 | 71.0          | 71p  |
| 28  | CsNO <sub>3</sub> additive + Dopamine coating on separator | 6.74                             | 9.0                                    | 4.2                                    | 355.5                               | 90                  | 73.3          | 28   |
|     | <b>This work</b>                                           | 5.1                              | 5.8                                    | 4.0                                    | 525.1                               | 500                 | 73.1          |      |
|     |                                                            | 10.5                             | 11.5                                   | 4.0                                    | 255.0                               | 300                 | 79.0          |      |
